# Unemployment and mortality in a large Italian cohort

Angelo d'Errico<sup>1</sup>, Cristiano Piccinelli<sup>1,2</sup>, Gabriella Sebastiani<sup>3</sup>, Fulvio Ricceri<sup>1,4</sup>,  
Veronica Sciannameo<sup>1</sup>, Moreno Demaria<sup>5</sup>, Paola Di Filippo<sup>3</sup>, and Giuseppe Costa<sup>4</sup>

<sup>1</sup>Epidemiology Department, Local Health Unit TO3, Piedmont Region, Grugliasco, Turin, Italy

<sup>2</sup>Center for Epidemiology and Prevention in Oncology, Città della Salute e della Scienza, Turin, Italy

<sup>3</sup>National Institute of Statistics, Rome, Italy

<sup>4</sup>Department of Clinical and Biological Sciences, University of Turin, Turin, Italy

<sup>5</sup>Department of Environmental Epidemiology, Piedmont Environmental Protection Agency, Turin, Italy

Address correspondence to Angelo d'Errico. E-mail: angelo.derrico@epi.piemonte.it.

## ABSTRACT

**Background** Aim of this study was to examine the association between unemployment and mortality, taking into account potential confounders of this association. A secondary objective was to assess whether the association between unemployment and mortality was modified by lack of household economic resources.

**Methods** Prospective cohort composed of a representative sample of Italian subjects 30–55 years who participated in the Italian National Health Survey 1999–2000, followed up for mortality up to 2012 (15 656 men and 11 463 women). Data were analyzed using Cox regression models, stratified by gender and adjusted for health status, behavioral risk factors, socioeconomic position and position in the household. The modifying effect of the lack of economic resources was assessed by testing its interaction with unemployment on mortality.

**Results** Among women, unemployment was not associated with mortality, whereas among men, higher mortality was found from all causes (HR = 1.82), which was not modified by lack of economic resources, and from neoplasms (HR = 1.59), cardiovascular diseases (HR = 2.58) and suicides (HR = 5.01).

**Conclusions** Results for men were robust to the adjustment for main potential confounders, suggesting a causal relationship between unemployment and mortality. The lack of effect modification by economic resources supports the relevance of the loss of non-material benefits of work on mortality.

**Keywords** individual behavior, mortality, socioeconomic factors

## Introduction

Work is a central element of persons' life because it is their main source of income and has a crucial role in shaping their socioeconomic position (SEP), which, in turn, is the main determinant of health and health inequalities.<sup>1</sup> During the last decades, unemployment has been found associated with increased morbidity<sup>2–5</sup> and mortality<sup>6–11</sup> in many studies, with consistent excess risks for overall mortality and for some specific causes of deaths, such as cardiovascular and respiratory diseases,<sup>6,7</sup> and suicides.<sup>12</sup> However, most of the available studies had little information on potential confounders of this association, making unclear whether unemployment has a direct causal effect of on health. In fact, it has been suggested that the increased mortality associated with

unemployment may be attributable to socioeconomic confounding, due to the fact that most unemployed have low education and low professional skills, or to health selection into and out of unemployment.<sup>13,14</sup> Also, although the direction of the association between behavioral factors and unemployment is still controversial, especially for smoking and physical activity, for which both selection and causation

Angelo d'Errico, Research Fellow  
Cristiano Piccinelli, Research Fellow  
Gabriella Sebastiani, Research Fellow  
Fulvio Ricceri, Research Fellow  
Veronica Sciannameo, PhD Student  
Moreno Demaria, Research Associate  
Paola Di Filippo, Research Fellow  
Giuseppe Costa, Professor

effects have been observed,<sup>15–20</sup> it has been hypothesized that the increased mortality of the unemployed may be attributable to exposure to unhealthy lifestyles prior to unemployment, increasing both the likelihood of future unemployment and mortality.<sup>21–23</sup>

A meta-analysis of studies on unemployment and mortality concluded that increased mortality persisted even considering only risk estimates adjusted for health status, behavioral risk factors and SEP at baseline, at least among men.<sup>24</sup> However, this conclusion was based on only three studies adjusted for all these dimensions,<sup>6,25,26</sup> among which two conducted in the UK and one in Japan; therefore, rising problems of generalizability of the results to other countries. A subsequent Swedish study with accurate control for health-related and socioeconomic covariates also observed an increased risk, but lower than that reported in previous studies.<sup>9</sup>

Therefore, the main objective of this study was to assess the mortality risk associated with unemployment in a large Italian cohort after controlling for health status, lifestyles and SEP.

Since the relationship between unemployment and health may be influenced by the availability of economic resources, such as wealth, assets or partner's income, we also wanted to ascertain whether economic resources were an effect modifier of the association between unemployment and mortality.

## Methods

### Data collection

The study population was composed of participants in the 1999–2000 National Health Interview Survey (NHIS), carried out by the National Institute of Statistics (hereafter ISTAT) mostly every 5 years, at each occasion on independent samples, representative of the Italian population. The NHIS has a two-stage sampling design, with municipalities as primary sampling units and households as secondary units. Further details on the sampling methodology of the NHIS can be found elsewhere.<sup>27</sup> The survey provides detailed information on health conditions, including perceived health, long-term chronic diseases, disability, lifestyles, and use of health services, as well as information on socio-demographic characteristics. The 1999–2000 NHIS had a 87% response rate and collected information on 140 011 subjects, belonging to about 52 000 different households.

### Outcome

The mortality follow-up of the cohort was conducted through individual record-linkage with the National Archive of Mortality 1999–2012, described in detail in a previous article on mortality of this cohort,<sup>27</sup> limited to 128 818 subjects

with complete demographic information (about 92% of the sample) (Supplementary Fig. S1).

Start of follow-up was set at the first day of the month following the interview, and the end of follow-up at 31 December 2012, or, for the deceased, at the date of death. Only subjects 30–55 years old were included in the study, as older subjects who had been unemployed could have already been retired, while two-third of subjects younger than 30 years were living with their parents, which may imply a smaller effect of unemployment on health. Self-employed workers ( $n = 9,093$ ) were excluded because of the small number of deceased subjects who reported to be unemployed in this group ( $n = 11$ ). Other seven men and one woman who died before the start of follow-up were also excluded.

The final population was composed of 27 119 subjects (15 656 males and 11 463 females), contributing overall to 340 720 person-years.

### Exposure

Information on employment status was collected through the questionnaire interview at baseline. Only subjects who were either employed or unemployed and in search of a new job were enrolled in the study.

### Covariates

Covariates considered in the analyses consisted of behavioral risk factors, health status, SEP, and position in the household.

Behavioral risk factors included physical activity level (four classes: no physical activity, light, moderate and intense activity), body mass index (BMI) (four standard categories), smoking history (pack-years smoked in quartiles among current or former smokers, with non-smokers as the reference category).

Health status was assessed by means of the physical component summary (PCS) score, categorized in quartiles, computed from answers to the SF-12 questionnaire (Ware et al.<sup>28</sup>), and of a Chronic Morbidity Index (CMI), also divided in quartiles (quantization limited to those with an Index above zero), constructed through self-reported information on the presence of 22 chronic disorders diagnosed by a physician.

SEP was assessed using as proxy indicators educational level (four categories: university degree, high school diploma, low secondary, elementary or less) and perceived household economic resources in the last 12 months (two categories: excellent or adequate; scarce or absolutely insufficient), as a proxy for income. Good concordance between self-reported perceived economic resources and quintiles of income has been found in the Italian data of the European Health Interview Survey 2015, with two-third of 30–55 years subjects reporting scarce or insufficient resources concentrated in the two lowest quintiles of the income distribution

**Table 1** Frequency distribution of covariates by employment status and gender. Baseline survey data. Italy, 1999–2000

| COVARIATES                                     | Employed men<br>(N = 14,883) | Unemployed men<br>(N = 773) | P value        | Employed women<br>(N = 9,911) | Unemployed women<br>(N = 1,552) | P value        |
|------------------------------------------------|------------------------------|-----------------------------|----------------|-------------------------------|---------------------------------|----------------|
| <b>Education</b>                               | <b>(%)</b>                   | <b>(%)</b>                  |                | <b>(%)</b>                    | <b>(%)</b>                      |                |
| University                                     | 16.4                         | 5.4                         | <0.001         | 21.7                          | 5.6                             | <0.001         |
| High school                                    | 39.8                         | 23.8                        |                | 46.1                          | 33.3                            |                |
| Low secondary                                  | 37.3                         | 55.9                        |                | 27.3                          | 50.8                            |                |
| Elementary or less                             | 6.5                          | 14.9                        |                | 4.9                           | 10.4                            |                |
| <b>Household position</b>                      | <b>(%)</b>                   | <b>(%)</b>                  |                | <b>(%)</b>                    | <b>(%)</b>                      |                |
| Single                                         | 9.3                          | 12.8                        | <0.001         | 9.1                           | 4.2                             | <0.001         |
| Couple with children                           | 10.2                         | 6.6                         |                | 10.6                          | 7.7                             |                |
| Couple without children                        | 68.0                         | 51.9                        |                | 61.8                          | 74.6                            |                |
| Single parent                                  | 1.3                          | 0.9                         |                | 7.4                           | 4.4                             |                |
| Subject living with parents or other relatives | 11.2                         | 27.8                        |                | 11.2                          | 9.2                             |                |
| <b>Household economic resources</b>            | <b>(%)</b>                   | <b>(%)</b>                  |                | <b>(%)</b>                    | <b>(%)</b>                      |                |
| Good or adequate                               | 77.0                         | 30.5                        | <0.001         | 81.3                          | 64.2                            | <0.001         |
| Scarce or insufficient                         | 23.0                         | 69.5                        |                | 18.7                          | 35.8                            |                |
| <b>Physical activity</b>                       | <b>(%)</b>                   | <b>(%)</b>                  |                | <b>(%)</b>                    | <b>(%)</b>                      |                |
| None                                           | 24.7                         | 30.4                        | <0.001         | 27.4                          | 25.5                            | <0.001         |
| Light                                          | 28.6                         | 34.7                        |                | 34.5                          | 38.2                            |                |
| Moderate                                       | 30.6                         | 24.6                        |                | 26.3                          | 27.8                            |                |
| Intense                                        | 16.1                         | 10.4                        |                | 11.8                          | 8.6                             |                |
| <b>Body mass index</b>                         | <b>(%)</b>                   | <b>(%)</b>                  |                | <b>(%)</b>                    | <b>(%)</b>                      |                |
| <18.5                                          | 0.5                          | 0.7                         | 0.01           | 4.1                           | 3.7                             | <0.001         |
| 18.5–24.9                                      | 48.9                         | 51.9                        |                | 68.2                          | 62.6                            |                |
| 25.0–29.9                                      | 42.0                         | 36.6                        |                | 21.5                          | 24.7                            |                |
| 30+                                            | 8.6                          | 10.9                        |                | 6.3                           | 9.0                             |                |
|                                                | <b>Mean (sd)</b>             | <b>Mean (sd)</b>            | <b>P value</b> | <b>Mean (SD)</b>              | <b>Mean (SD)</b>                | <b>P value</b> |
| Smoking (pack-years)                           | 14.1 (17.1)                  | 18.0 (20.9)                 | <0.0001        | 6.1 (10.1)                    | 5.6 (9.5)                       | 0.09           |
| Physical Component Summary                     | 53.2 (6.1)                   | 51.8 (8.4)                  | <0.0001        | 52.4 (6.8)                    | 51.6 (7.5)                      | <0.0001        |
| Chronic Morbidity Index                        | 1.5 (3.8)                    | 2.6 (5.6)                   | <0.0001        | 1.9 (4.0)                     | 2.4 (4.7)                       | <0.0001        |

(L Iannucci, personal communication, 2019). Among socio-demographics, position in the household was also considered (categorized as single, couple with children, couple without children, single parent, subject living with parents or other relatives), to take into account the family structure of the respondent and, in particular, the presence of dependent children.

### Statistical analysis

The frequency distribution of covariates between employed and unemployed subjects was compared using chi-square statistics, for categorical variables, and t-test, for continuous ones.

Hazard Ratios (HRs) of mortality associated with unemployment were estimated through Cox regression models. In a first analysis (Model 1), results were adjusted only for age

class (5-year categories), treated as a time-varying covariate, and geographical area of residence (three areas: North, Center and South and Islands). Afterward, behavioral risk factors, health status and socioeconomic covariates were added (Model 2).

Mortality from natural causes and for major groups of causes of death was also investigated, limited to those with at least five deaths observed in each sex, excluding from the analyses subjects who reported at baseline to suffer from a chronic disease belonging to the corresponding disease group.

To assess consistency with other studies on unemployment, mortality from suicides among men was investigated, in spite only three deaths occurred among the unemployed, after excluding subjects reporting anxiety or depression diagnosed by a physician at baseline.

**Table 2** Frequency distribution of vital status and selected major groups of causes of death of the study population at the end of follow-up. Italy, 1999–2012

|                                    | <b>Employed men<br/>(N = 14,883)</b> | <b>Unemployed<br/>men (N = 773)</b> |                | <b>Employed<br/>women<br/>(N = 9,911)</b> | <b>Unemployed<br/>women<br/>(N = 1,552)</b> |                |
|------------------------------------|--------------------------------------|-------------------------------------|----------------|-------------------------------------------|---------------------------------------------|----------------|
| <b>Cause of death</b>              | <b>N (%)</b>                         | <b>N (%)</b>                        | <b>P value</b> | <b>N (%)</b>                              | <b>N (%)</b>                                | <b>P value</b> |
| All causes                         | 517 (3.5)                            | 65 (8.4)                            | <0.001         | 166 (1.7)                                 | 32 (2.1)                                    | 0.28           |
| Natural causes                     | 460 (3.1)                            | 59 (7.6)                            | <0.001         | 153 (1.5)                                 | 31 (2.0)                                    | 0.19           |
| Neoplasms                          | 262 (1.8)                            | 25 (3.2)                            | 0.003          | 111 (1.1)                                 | 21 (1.4)                                    | 0.42           |
| Diseases of the circulatory system | 124 (0.8)                            | 15 (1.9)                            | 0.001          | 19 (0.2)                                  | 1 (0.06)                                    | 0.26           |
| <i>Coronary heart disease</i>      | 53 (0.4)                             | 7 (0.9)                             | 0.02           | 3 (0.03)                                  | 0 (0.0)                                     | 0.49           |
| Diseases of the respiratory system | 4 (0.03)                             | 2 (0.3)                             | 0.001          | 4 (0.04)                                  | 2 (0.1)                                     | 0.16           |
| Diseases of the digestive system   | 24 (0.2)                             | 8 (1.0)                             | <0.001         | 4 (0.04)                                  | 2 (0.1)                                     | 0.16           |
| Other natural causes               | 46 (0.3)                             | 9 (1.2)                             | <0.001         | 15 (0.2)                                  | 5 (0.3)                                     | 0.13           |
| Natural causes not alcohol-related | 373 (2.5)                            | 46 (6.0)                            | <0.001         | 112 (1.1)                                 | 26 (1.7)                                    | 0.07           |
| Violent causes                     | 57 (0.4)                             | 6 (0.8)                             | 0.09           | 13 (0.1)                                  | 1 (0.06)                                    | 0.48           |
| Suicides                           | 9 (0.06)                             | 3 (0.4)                             | 0.001          | 1 (0.01)                                  | 0 (0.0)                                     | 0.69           |
| <b>Alive</b>                       | <b>14 366 (96.5)</b>                 | <b>708 (91.6)</b>                   |                | <b>9745 (98.3)</b>                        | <b>1520 (97.9)</b>                          |                |
| <b>Total</b>                       | <b>14 883 (100.0)</b>                | <b>773 (100.0)</b>                  |                | <b>9911 (100.0)</b>                       | <b>1552 (100.0)</b>                         |                |

Given that no information on alcohol consumption was available, the risk of mortality from natural causes after excluding causes potentially attributable to alcohol was also estimated (tumors of oral cavity, pharynx, larynx, esophagus, liver and colorectum; liver cirrhosis, alcoholic liver disease and other or unspecified forms of liver disease).

The eventual modifying effect of availability of household economic resources was assessed by comparing the models with and without interaction term with unemployment through the likelihood ratio test, which tests interactions on the multiplicative scale.

To assess whether adjustment for PCS and CMI provided an accurate control for confounding by health status, a sensitivity analysis was conducted on overall mortality after excluding subjects reporting at baseline chronic diseases known to influence mortality (coronary heart disease, other heart diseases, cerebrovascular disorders, hypertension, diabetes, chronic bronchitis or emphysema, asthma, thyroid diseases, liver cirrhosis, chronic hepatitis, neoplasms, neurological diseases, anxiety or depression), also adjusting for the same covariates as in the main analysis.

All statistical analyses were performed using the software Stata (version 13).

## Results

The proportion of unemployed subjects in the cohort at baseline was 4.9% among men and 13.5% among women. In both

genders, the unemployed were less educated, had a higher CMI and were more likely to report scarce or insufficient economic resources (Table 1).

During follow-up, 780 deaths occurred in the cohort (2.9%), 582 among males (3.7%) and 198 among females (1.7%) (Table 2), with an average follow-up time to death of 7.6 years (sd: 3.5 years). Among unemployed men, the proportion of deceased subjects was more than the double of that of the employed (8.4% vs. 3.5%;  $P < 0.001$ ), whereas among women the difference was much smaller (2.1% vs. 1.7%;  $P = 0.28$ ). Kaplan–Meier survival analysis during follow-up by employment status at baseline showed significantly lower survival among the unemployed for men, but not for women (log rank test:  $P < 0.0001$  for men,  $P = 0.28$  for women) (Figure 1).

### Risk of mortality associated with unemployment Men

In the analysis adjusted for age and area of residence, the risk of death was increased among unemployed men (HR = 2.66, 95% CI: 2.05–3.46) (Table 3, Model 1). Adjusting the analysis for behavioral risk factors, health status, and socio-demographic characteristics, the mortality risk decreased, but remained significant (HR = 1.82, 95% CI: 1.37–2.41) (Table 3, Model 2). Area of residence practically did not change the risk of mortality associated with unemployment when adjusted for in the models (data not shown), nor

it exerted a modifying effect on the relationship between unemployment and mortality (test for interaction:  $P = 0.16$  among men,  $P = 0.15$  among women).

Similar results were obtained considering only deaths from natural causes, which represented about 90% of all deaths. Mortality from violent causes was non-significantly elevated among unemployed men, with a strong increase in risk for suicides (HR = 5.01, 95% CI: 1.13–22.2) in the fully adjusted model.

Examining major groups of causes of death, in the area- and age-adjusted analysis unemployment was associated with neoplasms (HR = 2.19, 95% CI: 1.44–3.32), and with diseases of the circulatory (HR = 3.27, 95% CI: 1.87–5.72) and the digestive systems (HR = 5.65, 95% CI: 2.36–13.5). Adjustment for behavioral risk factors, health and socio-demographics reduced the HRs for these causes of death, but, except for digestive disorders, they remained significantly elevated (HR = 1.59, 95% CI: 1.02–2.49 for neoplasms; HR = 2.58, 95% CI: 1.41–4.72 for circulatory).

Mortality was also increased for a residual category of natural causes of death not belonging to any of the four disease groups examined (HR = 2.84, 95% CI: 1.27–6.32 in the fully adjusted model).

The analysis performed excluding alcohol-related causes of deaths showed that the mortality risk was very similar to that computed for natural causes, suggesting that the association between unemployment and mortality was unlikely strongly confounded by alcohol drinking (Table 3).

## Women

Among women, no association with unemployment was observed, neither for overall mortality nor for major groups of causes, partly because of the small number of deaths observed (Table 3). An association emerged for causes unrelated to alcohol consumption (HR = 1.55, 95% CI: 1.01–2.38), but it decreased and lost significance in the fully adjusted model (HR = 1.46, 95% CI: 0.93–2.29).

## Interaction between unemployment and household economic resources

No significant interaction was found between unemployment and availability of household economic resources in neither gender (test for interaction:  $P = 0.12$  among men;  $P = 0.55$  among women); unexpectedly, in men the association between unemployment and mortality was stronger for subjects reporting good economic resources (HR = 2.55, 95% CI: 1.60–4.04 vs. HR = 1.70, 95% CI: 1.19–2.44). Similar results were obtained testing the interaction between unemployment and current/last occupation in manual or non-

manual work, as a proxy indicator of income, on mortality (test for interaction:  $P = 0.17$  among men;  $P = 0.32$  among women).

## Sensitivity analysis

The results of the sensitivity analysis on overall mortality, conducted after exclusion of the subjects reporting health conditions at baseline potentially associated with mortality, were very similar to those obtained in the whole sample from the fully adjusted model (men: HR = 1.78, 95% CI: 1.28–2.47; women: HR = 1.25, 95% CI: 0.76–2.06) (Table 3, Model 2).

## Discussion

### The main finding of this study

The present study found an age- and area-adjusted risk of overall mortality almost three times higher among unemployed men, compared to those employed, whereas among women the increase in risk was much smaller and not statistically significant. Although among men the strength of association practically halved from the model adjusted for age and area of residence to the fully adjusted model, the risk remained significantly elevated, suggesting a direct effect of unemployment on health. The sensitivity analysis confirmed the validity of our results, demonstrating that the increased risk of mortality among unemployed men in the fully adjusted model was not attributable to residual confounding by health.

### What is already known on this topic

Our results for men are similar to those from the few studies conducted in Italy or in other Southern European countries,<sup>8,11</sup> showing mortality risks 2–3 times higher among unemployed men. A French study also reported a high age-adjusted mortality risk (RR = 2.79) associated with unemployment in a cohort of healthy volunteers,<sup>10</sup> but its results were not stratified by gender.

The lower mortality risk associated with unemployment among women appears also consistent with previous research. In the meta-analysis by Roelfs *et al.*,<sup>24</sup> the age-adjusted mortality among women was about half that observed among men and only slightly higher than that estimated in the present study. Among studies published afterward, most reported low and not significant excess risks for women,<sup>29–32</sup> although a few observed stronger associations.<sup>33,34</sup> The smaller risk among women may reflect the prevalent breadwinner role of men in high-income countries, especially in those societies characterized by more traditional family values and low participation of women in the labor market, like Italy.

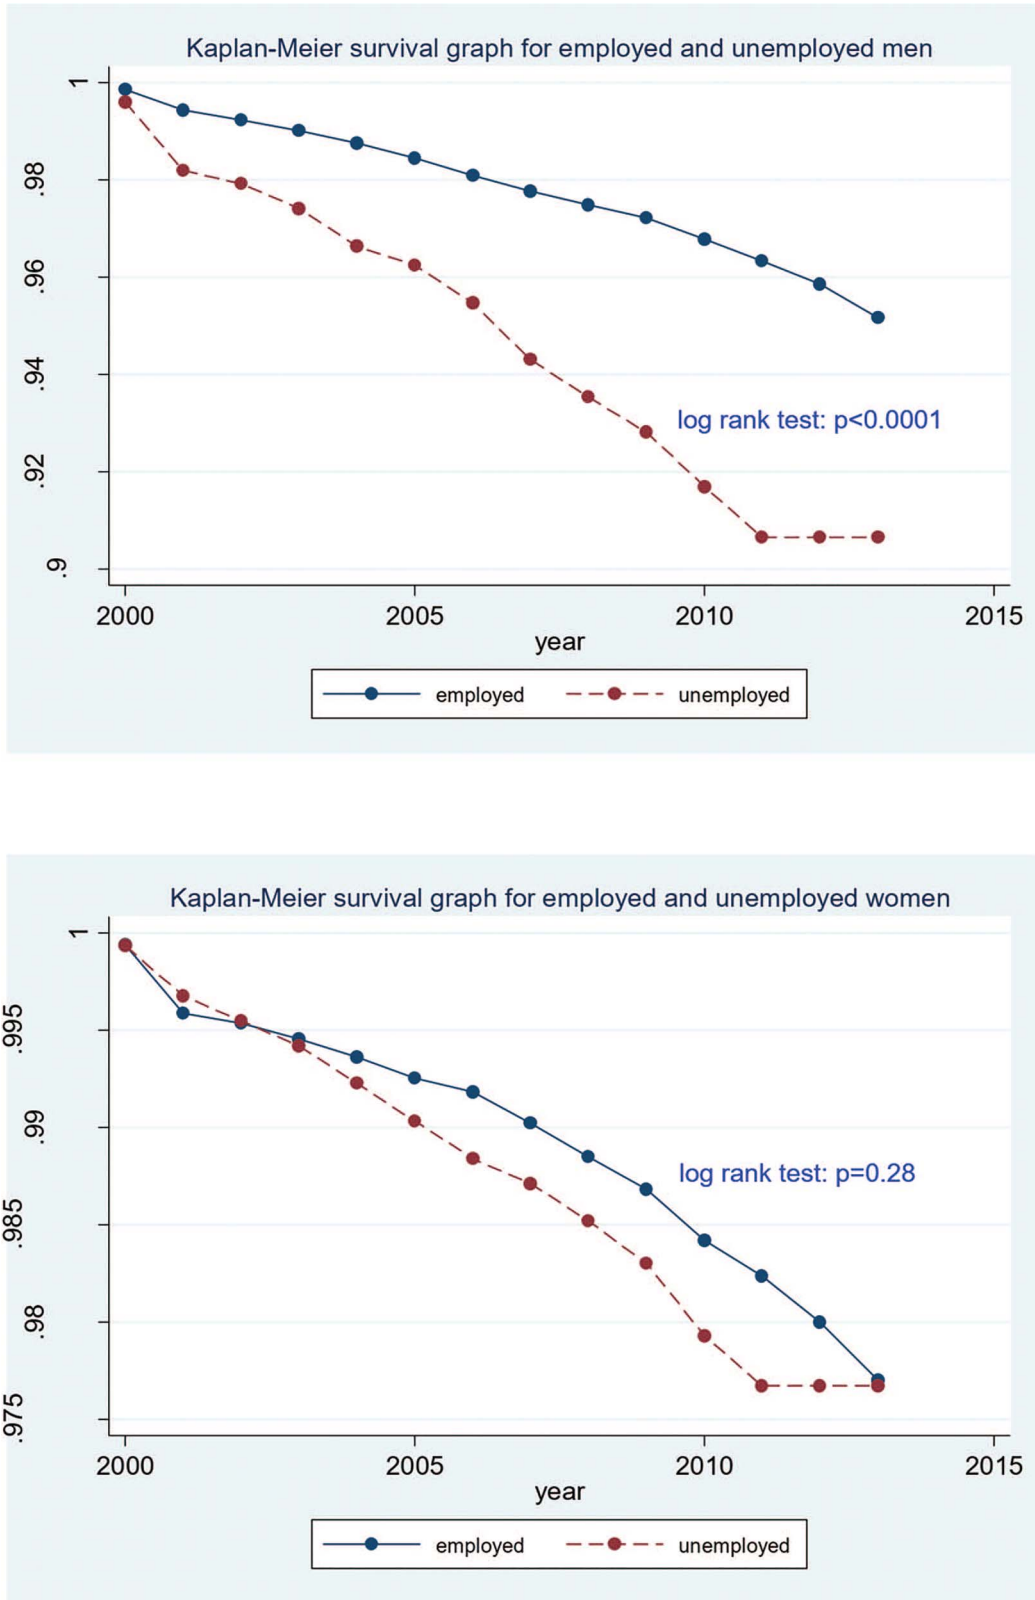

Fig. 1 Kaplan–Meier survival graphs 1999–2012 of the study population by employment status at baseline and gender.

**Table 3** HRs of mortality from all causes and for major groups of causes of death associated with unemployment at baseline, by gender. Italy, 1999–2012

| Causes of death                    | No. of exposed cases | Model 1 <sup>a</sup><br>HR (95% CI) | Model 2 <sup>b</sup><br>HR (95% CI) |
|------------------------------------|----------------------|-------------------------------------|-------------------------------------|
| <b>MEN (ref: employed)</b>         |                      |                                     |                                     |
| All deaths                         | 65                   | <b>2.66 (2.05–3.46)</b>             | <b>1.82 (1.37–2.41)</b>             |
| Natural causes of death            | 59                   | <b>2.74 (2.08–3.61)</b>             | <b>1.89 (1.41–2.55)</b>             |
| Neoplasms                          | 25                   | <b>2.19 (1.44–3.32)</b>             | <b>1.59 (1.02–2.49)</b>             |
| Circulatory system                 | 15                   | <b>3.27 (1.87–5.72)</b>             | <b>2.58 (1.41–4.72)</b>             |
| <i>Coronary heart disease</i>      | 7                    | <b>3.32 (1.46–7.56)</b>             | <b>2.58 (1.05–6.37)</b>             |
| Digestive system                   | 8                    | <b>5.65 (2.36–13.5)</b>             | 2.27 (0.85–6.03)                    |
| Other causes <sup>c</sup>          | 9                    | <b>3.72 (1.79–7.74)</b>             | <b>2.84 (1.27–6.32)</b>             |
| Natural causes not alcohol-related | 46                   | <b>2.59 (1.90–3.54)</b>             | <b>1.88 (1.35–2.64)</b>             |
| Violent causes of death            | 6                    | 2.01 (0.85–4.73)                    | 1.67 (0.68–4.14)                    |
| <i>Suicides</i>                    | 3                    | <b>5.23 (1.36–20.1)</b>             | <b>5.01 (1.13–22.2)</b>             |
| <b>WOMEN (ref: employed)</b>       |                      |                                     |                                     |
| All deaths                         | 32                   | 1.29 (0.88–1.88)                    | 1.29 (0.87–1.92)                    |
| Natural causes of death            | 31                   | 1.35 (0.92–1.99)                    | 1.32 (0.88–2.00)                    |
| Neoplasms                          | 21                   | 1.23 (0.76–1.99)                    | 1.21 (0.73–1.99)                    |
| Other causes <sup>c</sup>          | 5                    | 2.12 (0.77–5.84)                    | 2.10 (0.70–6.36)                    |
| Natural causes not alcohol-related | 26                   | <b>1.55 (1.01–2.38)</b>             | 1.46 (0.93–2.29)                    |

<sup>a</sup>Model 1: age and area of residence.

<sup>b</sup>Model 2: age and area of residence + smoking (pack-years), physical activity and BMI + health status + socioeconomic status (education, household economic resources) + position in the household.

<sup>c</sup>Deaths from neoplasms, and from cardiovascular, respiratory and digestive diseases are excluded.

### What the study adds

Our study was one of the few, and the first one in Southern Europe, allowing to examine, in a sample representative of the general population, the association of unemployment with mortality after controlling for a large set of covariates collected at baseline, including the main potential confounders of this association in the literature.

It is possible that the strong reduction observed in the risk of mortality in the fully adjusted model was in part the result of an overadjustment, as the covariates used to adjust the risk estimates, in particular, behavioral factors, may be also mediators of the unemployment-mortality relationship. In fact, the direction of the relation between behavioral factors and unemployment appears uncertain in the literature, and several studies have reported an increase in risky lifestyles following unemployment,<sup>16–18</sup> which would then be intermediate factors on the causal chain from unemployment to mortality.

Various mechanisms have been proposed to explain the higher risk of mortality of the unemployed, including on one hand deprivation of aspects of identity and relationships linked to work,<sup>35</sup> on the other hand, financial strain, intended,

rather than exposure to material poverty, as the difficulty in paying for daily life expenses needed to participate in social and family activities.<sup>36</sup> In both these theoretical models, the psychological stress associated with unemployment is considered a fundamental mechanism and this view is supported by studies showing an increase in cortisol levels related to job loss or unemployment, in particular, long-term unemployment.<sup>37–39</sup> This finding suggests that chronic activation of the Hypothalamus–Pituitary–Adrenal axis may be an important mechanism underlying the association between unemployment and mortality, possibly through a pathway leading to an increase in inflammatory markers,<sup>40,41</sup> which, in turn, would be responsible for the development of several different chronic disorders, such as neoplasms<sup>42</sup> and cardiovascular diseases.<sup>43</sup> The analysis of major groups of natural causes of death revealed that excess mortality among men was not concentrated in a specific group, but was spread across several outcomes, coherently with the proposed biological mechanism.

The high risk of mortality observed among the unemployed in Italy, compared to other countries, may be a consequence of the poor level of social welfare provided in this

country,<sup>44</sup> as during the years under investigation measures of income support for the unemployed were characterized by low salary replacement rate and strict requisites for accessing them. Nonetheless, the lack of effect modification by household economic resources would favor the hypothesis that unemployment increases mortality through psychological stress due to the loss of non-material benefits of work,<sup>35</sup> rather than through material poverty or financial strain.

### Limitations

A limitation of the study is that the record-linkage with the National Archive of Mortality was incomplete, with a mortality underestimation by around 10%, as suggested by a comparison of the number of deaths in the cohort with the expected number of deaths at the national level, although it seems unlikely that vital status ascertainment had been differential by exposure status.

Also, as the present study focused on mortality, it cannot be excluded that the higher mortality among the unemployed would be actually attributable, at least in part, to a reduced seek or access to health care, compared to the employed population.<sup>45,46</sup> However, the national health care system in Italy has universalistic access since 1978, with exemption from payment for any kind of health care provided to people with low income, which makes unlikely strong differences in health care accessibility related to unemployment.

Another limitation is that unemployment was assessed only once, without information on unemployment before the survey, which has likely produced a certain degree of non-differential misclassification of ever unemployment, with a consequent attenuation of the associated mortality risk. Ascertainment of unemployment at a single time has also probably caused overrepresentation of long-term unemployed in the sample. However, the baseline survey was conducted in a period when the unemployment rate peaked in Italy, reaching 11% in the population of working age (8.5% among men and 15% among women), while steadily declining in the subsequent 5 years to only 6%. Both the large proportion of workers undergoing unemployment at the end of the '90s as well as the fact that many of them regained a job in the next few years have likely limited the selection of long-term unemployed in the cohort.

In conclusion, among men the association between unemployment and mortality was robust to adjustment for differences in health status, behavioral factors and socioeconomic conditions, giving support to the causal nature of this association. The smaller and non-significant risk observed among women may reflect the prevalent breadwinner role of men in Italy.

### Acknowledgments

The study was performed using data of the Italian Longitudinal Study, which has been developed and is maintained within the framework of the National Statistics Plan, approved by the Italian Authority for privacy. The study was conducted according to the principles expressed in the Declaration of Helsinki for studies on humans. Written informed consent has been obtained from all participants.

### Funding

This research did not receive any specific grant from funding agencies in the public, commercial, or not-for-profit sectors.

### Conflict of interest

None declared.

### References

- Marmot M. Social determinants of health inequalities. *Lancet* 2005;**365**(9464):1099–104.
- Brown J, Demou E, Tristram MA *et al.* Employment status and health: understanding the health of the economically inactive population in Scotland. *BMC Public Health* 2012;**12**:327.
- Dupre ME, George LK, Liu G *et al.* The cumulative effect of unemployment on risks for acute myocardial infarction. *Arch Intern Med* 2012;**172**(22):1731–7.
- Lundin A, Falkstedt D, Lundberg I *et al.* Unemployment and coronary heart disease among middle-aged men in Sweden: 39243 men followed for 8 years. *Occup Environ Med* 2014;**71**(3):183–8.
- Kogevinas M, Antó JM, Tobias A *et al.* Respiratory symptoms, lung function and use of health services among unemployed young adults in Spain. Spanish Group of the European Community Respiratory Health Survey. *Eur Respir J* 1998;**11**(6):1363–8.
- Morris JK, Cook DG, Shaper AG. Loss of employment and mortality. *BMJ* 1994;**308**(6937):1135–9.
- Martikainen PT. Unemployment and mortality among Finnish men, 1981–5. *BMJ* 1990;**301**(6749):407–11.
- Costa G, Segnan N. Unemployment and mortality. *BMJ* 1987;**294**(6586):1550–1.
- Lundin A, Lundberg I, Hallsten L *et al.* Unemployment and mortality—a longitudinal prospective study on selection and causation in 49321 Swedish middle-aged men. *J Epidemiol Community Health* 2010;**64**:22–8.
- Meneton P, Kesse-Guyot E, Méjean C *et al.* Unemployment is associated with high cardiovascular event rate and increased all-cause mortality in middle-aged socially privileged individuals. *Int Arch Occup Environ Health* 2015;**88**:707–16.
- Regidor E, Calle ME, Domínguez V, Navarro P. Mortalidad según características sociales y económicas: Estudio de Mortalidad de la



- Comunidad Autónoma de Madrid [mortality by social and economic characteristics: the mortality study of the Autonomous Community of Madrid]. *Med Clin (Barc)* 2001;**116**:726–31 Article in Spanish.
- 12 Stack S. Suicide: a 15-year review of the sociological literature. Part I: cultural and economic factors. *Suicide Life Threat Behav* 2000;**30**:145–62.
  - 13 Bartley M, Owen C. Relation between socioeconomic status, employment, and health during economic change, 1973–93. *BMJ* 1996;**313**:445–9.
  - 14 Böckerman P, Ilmakunnas P. Unemployment and self-assessed health: evidence from panel data. *Health Econ* 2009;**18**:161–79.
  - 15 Brook JS, Zhang C, Burke L, Brook DW. Trajectories of cigarette smoking from adolescence to adulthood as predictors of unemployment status. *Nicotine Tob Res* 2014;**16**:1559–66.
  - 16 Kalousova L, Burgard SA. Unemployment, measured and perceived decline of economic resources: contrasting three measures of recessionary hardships and their implications for adopting negative health behaviors. *Soc Sci Med* 2014;**106**:28–34.
  - 17 Bolton KL, Rodriguez E. Smoking, drinking and body weight after re-employment: does unemployment experience and compensation make a difference? *BMC Public Health* 2009;**9**:77.
  - 18 Lee JO, Jones TM, Kosterman R *et al*. The association of unemployment from age 21 to 33 with substance use disorder symptoms at age 39: the role of childhood neighborhood characteristics. *Drug Alcohol Depend* 2017;**174**:1–8.
  - 19 Gough M. A couple-level analysis of participation in physical activity during unemployment. *SJM Popul Health* 2017;**3**:294–304.
  - 20 Robroek SJ, Schuring M, Croezen S *et al*. Poor health, unhealthy behaviors, and unfavorable work characteristics influence pathways of exit from paid employment among older workers in Europe: a four year follow-up study. *Scand J Work Environ Health* 2013;**39**:125–33.
  - 21 Leino-Arjas P, Liira J, Mutanen P *et al*. Predictors and consequences of unemployment among construction workers: prospective cohort study. *BMJ* 1999;**319**:600–5.
  - 22 Hoffmann JP, Dufur M, Huang L. Drug use and job quits: a longitudinal analysis. *J Drug Issues* 2007;**37**:569–96.
  - 23 Kendler KS, Ohlsson H, Karriker-Jaffe KJ *et al*. Social and economic consequences of alcohol use disorder: a longitudinal cohort and correlative analysis. *Psychol Med* 2017;**47**:925–35.
  - 24 Roelfs DJ, Shor E, Davidson KW *et al*. Losing life and livelihood: a systematic review and meta-analysis of unemployment and all-cause mortality. *Soc Sci Med* 2011;**72**:840–54.
  - 25 Gardner J, Oswald A. How is mortality affected by money, marriage, and stress? *J Health Econ*. 2004;**23**(6):1181–207.
  - 26 Hirokawa K, Tsutsumi A, Kayaba K. Impacts of educational level and employment status on mortality for Japanese women and men: the Jichi medical school cohort study. *Eur J Epidemiol*. 2006;**21**(9):641–51.
  - 27 Marinacci C, Grippo F, Pappagallo M *et al*. Social inequalities in total and cause-specific mortality of a sample of the Italian population, from 1999 to 2007. *Eur J Public Health* 2013;**23**:582–7.
  - 28 Ware J Jr, Kosinski M, Keller SD. A 12-Item Short-Form Health Survey: construction of scales and preliminary tests of reliability and validity. *Med Care* 1996;**34**:220–33.
  - 29 Mustard CA, Bielecky A, Etches J *et al*. Mortality following unemployment in Canada, 1991–2001. *BMC Public Health* 2013;**13**:441.
  - 30 Clemens T, Popham F, Boyle P. What is the effect of unemployment on all-cause mortality? A cohort study using propensity score matching. *Eur J Public Health* 2015;**25**:115–21.
  - 31 Garcy AM, Vägerö D. The length of unemployment predicts mortality, differently in men and women, and by cause of death: a six year mortality follow-up of the Swedish 1992–1996 recession. *Soc Sci Med* 2012;**74**:1911–20.
  - 32 Helgesson M, Johansson B, Nordqvist T *et al*. Unemployment at a young age and later sickness absence, disability pension and death in native swedes and immigrants. *Eur J Public Health* 2013;**23**:606–10.
  - 33 Van Hedel K, Van Lenthe FJ, Avendano M *et al*. Marital status, labour force activity and mortality: a study in the USA and six European countries. *Scand J Public Health* 2015;**43**:469–80.
  - 34 Holseter C, Dalen JD, Krokstad S, Eikemo TA. Self-rated health and mortality in different occupational classes and income groups in Nord-Trøndelag County, Norway. *Tidsskr Nor Lægeforen* 2015;**135**:434–8.
  - 35 Jahoda M. *Employment and Unemployment: A Social-Psychological Analysis*. London: Cambridge University Press, 1982.
  - 36 Thomas C, Benzeval M, Stansfeld S. Psychological distress after employment transitions: the role of subjective financial position as a mediator. *J Epidemiol Community Health* 2007;**61**:48–52.
  - 37 Grossi G, Perski A, Lundberg U, Soares J. Associations between financial strain and the diurnal salivary cortisol secretion of long-term unemployed individuals. *Integr Physiol Behav Sci* 2001;**36**:205–19.
  - 38 Maier R, Egger A, Barth A *et al*. Effects of short- and long-term unemployment on physical work capacity and on serum cortisol. *Int Arch Occup Environ Health* 2006;**79**:193–8.
  - 39 Dettenborn L, Tietze A, Bruckner F, Kirschbaum C. Higher cortisol content in hair among long-term unemployed individuals compared to controls. *Psychoneuroendocrinology* 2010;**35**:1404–9.
  - 40 Silverman MN, Sternberg EM. Glucocorticoid regulation of inflammation and its functional correlates: from HPA axis to glucocorticoid receptor dysfunction. *Ann N Y Acad Sci* 2012;**1261**:55–63.
  - 41 Spiga F, Lightman SL. Dynamics of adrenal glucocorticoid steroidogenesis in health and disease. *Mol Cell Endocrinol* 2015;**408**:227–34.
  - 42 Munn LL. Cancer and inflammation. *Wiley Interdiscip Rev Syst Biol Med* 2017;**9**(2).
  - 43 Golia E, Limongelli G, Natale F *et al*. Inflammation and cardiovascular disease: from pathogenesis to therapeutic target. *Curr Atheroscler Rep* 2014;**16**:435.
  - 44 Bamba C, Eikemo TA. Welfare state regimes, unemployment and health: a comparative study of the relationship between unemployment and self-reported health in 23 European countries. *J Epidemiol Community Health* 2009;**63**:92–8.
  - 45 Hoon E, Pham C, Beilby J, Karnon J. Unconnected and out-of-sight: identifying health care non-users with unmet needs. *BMC Health Serv Res* 2017;**17**:80.
  - 46 Driscoll AK, Bernstein AB. *Health and Access to Care among Employed and Unemployed Adults: United States, 2009–2010*. NCHS Data Brief, no 83. Hyattsville, MD: National Center for Health Statistics, 2012.
